# Supplementary material for: Functional Proteomic Analysis of Advanced Serous Ovarian Cancer Using Reverse Phase Protein Array: TGF-β Pathway Signaling Indicates Response to Primary Chemotherapy
Source: Oxford University Press journal article supplement (doi:10.1158/1078-0432.ccr-09-2502), 2010-05-11
Supplement: 10780432ccr092502-sup-supplementary_table_s1.xls [file 10780432ccr092502-sup-supplementary_table_s1.xls]

## Sheet: List for Paper
Label	Protein	Phosphorylation Site	Company	Cat #	Concentration	Comment
4EBP1	4EBP1		Cell Signaling	9452	1:150
4EBP1.pT37.T46	4EBP1	T37 T46	Cell Signaling	9459	1:150
ACC.pS79	Acetyl CoA	S79	Cell Signaling	3661	1:250
AIB.1	Amplified in Breast Cancer		BD Pharmingen	611105	1:50
AKT	AKT		Cell Signaling	9272	1:250
AKT.pS473	AKT	S473	Cell Signaling	9271	1:250
AKT.pT308	AKT	T308	Cell Signaling	9275	1:200
AMPK	AMPK		Cell Signaling	2532	1:250
AMPK.pT172	AMPK	T172	Cell Signaling	2535	1:200
AR	ANDROGEN RECEPTOR		Epitomics	1852	1:100
BAD.pS112	BAD	S112	Cell Signaling	9291	1:200
BCL2	BCL2		Dako	M0887	1:200
BCL2p70	BCL2	S70	Cell Signaling	2871	1:100	Validation still pending
Caspase7.C	CASPASE 7		Cell Signaling	9491	1:150
CAV1	CAVEOLIN 1		Cell Signaling	3238	1:1000
c-Jun	c-Jun		Cell Signaling	9165	1:150	Validation still pending
c-Junp73	c-Jun	S73	Cell Signaling	9164	1:100	Validation still pending
Cleav PARP	Cleaved PARP		Cell Signaling	9541	1:100	Validation still pending
Collagen VI	Collagen VI		Santa Cruz	20649	1:750
CCNB1	CYCLIN B1		Epitomics	1495	1:500
CCND1	CYCLIN D1		Santa Cruz	718	1:1000
CCNE1	CYCLIN E1		Santa Cruz	247	1:250
CCNE2	CYCLIN E2		Epitomics	1142	1:200
CD31	CD31		Dako	M0823	1:750
CDH1	E-CADHERIN		Cell Signaling	4065	1:200
c-JUN	C-JUN		Cell Signaling	9165	1:150
c-KIT	C-KIT		Epitomics	1522-1	1:1000
c-MYC	C-MYC		Cell Signaling	9402	1:100
c-MYC.pT58.S62	C-MYC	T58 S62	Cell Signaling	9401	1:150	Validation still pending
B Catenin	β-CATENIN		Cell Signaling	9562	1:1500
EGFR	EGFR		Santa Cruz	3	1:200
EGFRp922	EGFR	T992	Cell Signaling	2235	1:100
ER.p167	ESTROGEN RECEPTOR ALPHA	S167	Cell Signaling	2514	1:250	Validation still pending
ER.pS118	ESTROGEN RECEPTOR ALPHA	S118	Epitomics	1091-1	1:300
ER	ESTROGEN RECEPTOR ALPHA		Neomarkers	SP1	1:200
Fortilin	FORTILIN		Provided by R. Chambers		1:5000
FKHRL1	FOXO3A		Cell Signaling	9467	1:500
FKHRL1pS318.S321	FOXO3A	S318 S321	Cell Signaling	9465	1:2000
FRAP1	mTOR		Cell Signaling	2983	1:800
GATA-3	GATA-3		BD Biosciences	558686	1:100
GSK3α&β	GSK3α&β		Santa Cruz	7291	1:2000
GSK3α&β.pS21.S9	GSK3α&β	S21 S9	Cell Signaling	9331	1:250
HER2	HER2		Cell Signaling	2242	1:100
hnRNP.A1	hnRNP A2.B1		Provided by Dr. R. Bast		1:200	Validation still pending
IGFRb	IGFR BETA		Cell Signaling	3027	1:500
JAB1	JAB1		Santa Cruz	13157	1:5000	Validated in another lab
JNK	JNK		Santa Cruz	474	1:400
JNK.pT183.Y185	JNK	T183 Y185	Cell Signaling	9251	1:150
MAPK.pT202.Y204	ERK1/ERK2	T202 Y204	Cell Signaling	9101	1:1200
MAPK1	ERK2		Santa Cruz	154	1:1200
MEK1	MEK		Epitomics	1235-1	1:4000
MEK1&2.pS217.S221	MEK	S217 S221	Cell Signaling	9121	1:1000
mTOR.pS2448	mTOR	S2448	Cell Signaling	2971	1:200
NOTCH1	NOTCH1		Cell Signaling	3268	1:100	Validation still pending
p21	P21		Santa Cruz	397	1:100	Not Valid
p27	P27		Santa Cruz	528	1:300	Validation still pending
p38	P38 MAPK (14)		Cell Signaling	9212	1:100
p38p180_182	p38 MAPK (14)	T180 Y182	Cell Signaling	9211	1:100
p53	P53		Cell Signaling	9282	1:3000	Not Valid
P70S6K	P70S6K		Cell Signaling	9205	1:300
P70S6K.pT389	P70S6K	T389	Epitomics	1494	1:150
PAI1	PAI1		BD Pharmingen	612024	1:1000
PDK1	PDK1		Cell Signaling	3062	1:250
PDK1.pS241	PDK1	S241	Cell Signaling	3061	1;100
PI3K.p110	PI3K P110 ALPHA		Epitomics	1683	1:500
PR	PROGESTERONE RECEPTOR		Epitomics	1483-1	1:300
pRb	RB		Cell Signaling	9309	1:2000
pRbp807_811	RB	S807 S811	Cell Signaling	9308	1:100
PCNA	PCNA		Abcam	29100	1:1000	Validation still pending
PR	PROGESTERONE RECEPTOR		Epitomics	1483	1:250
PKCA	PROTEIN KINASE C ALPHA		Upstate	5-154	1:2000
PKCA.pS567	PROTEIN KINASE C ALPHA	S567	Upstate	6-822	1:2000
PTEN	PTEN		Cell Signaling	9552	1:1000
RAB25	RAB25		Provided by Dr. P Cheng		1:4000
S6pS235.S236	S6	S236 S236	Cell Signaling	2211	1:40000
S6pS240.S244	S6	S240 S244	Cell Signaling	2215	1:5000
SGK	SGK		Cell Signaling	3272	1:200	Validation still pending
SGK.pS78	SGK	S78	Cell Signaling	3271	1:200	Validation still pending
Smad3	Smad3		Epitomics	1735	1:200
SRC	SRC		Upstate	5-184	1:200
SRC.pY416	SRC	Y416	Cell Signaling	2101	1:100
SRC.pY527	SRC	Y527	Cell Signaling	2105	1:400
STAT3	STAT3		Upstate	6-596	1:500
STAT3.pS727	STAT3	S727	Cell Signaling	9134	1:200	Validation still pending
STAT3.pY705	STAT3	Y705	Cell Signaling	9131	1:100
STAT5	STAT5		Epitomics	1289	1:250
STAT6.pY641	STAT6	Y641	Cell Signaling	9361	1:100
STATHMIN	STATHMIN		Epitomics	1972	1:1000
TAU	TAU		Upstate	5-348	1:500
TAZ	TAZ		Abcam	3961	1:250
TGLU	TRANSGLUTAMINASE		Lab Vision	MS224	1:750
TSC2	TUBERIN		Epitomics	1613-1	1:500
TSC2.pT1462	TUBERIN	T1462	Cell Signaling	3617	1:200
VEGFR2	VEGFR2		Cell Signaling	2479	1:700
XIAP	XIAP		Cell Signaling	2042	1:200
YAP	YES-ASSOCIATED PROTEIN		Santa Cruz	15407	1:500
YKL-40	YKL-40		Provided by R. Chambers		1:900
14-3-3 Zeta	14-3-3 Zeta		Chemicon	AB9746	1:750	Validated in other lab
14-3-3 Beta	14-3-3 Beta		Provided by R. Chambers		1:500	Validation still pending
