# Supplementary material for: Functional Proteomic Analysis of Advanced Serous Ovarian Cancer Using Reverse Phase Protein Array: TGF-β Pathway Signaling Indicates Response to Primary Chemotherapy
Source: Oxford University Press journal article supplement (doi:10.1158/1078-0432.ccr-09-2502), 2010-05-11
Supplement: 10780432ccr092502-sup-supplementary_table_s2.xls [file 10780432ccr092502-sup-supplementary_table_s2.xls]

## Sheet: Sheet1
	PATHWAY ANALYSIS FOR FALSE DISCOVERY
	RPPA NAME	GENE NAME	PATHWAY DESIGNATIONS
1	AcCoA	ACACA	CARBOHYDRATE METABOLISM		INSULIN
2	AcCoAp79	ACACA	CARBOHYDRATE METABOLISM		INSULIN
3	AIB1	RAC3	BR_CA_ESTROGEN	WNT SIGNALING	MAPK	VEGF	CELLADHESION
4	Akt	AKT1	AKT	MTOR	BAD	PTEN	MAPK	Jak/STAT	ERBB2	VEGF	APOPTOSIS	ADHESION	TIGHT JXN	Toll-like
5	Aktp308	AKT1	AKT	MTOR	BAD	PTEN	MAPK	Jak/STAT	ERBB2	VEGF	APOPTOSIS	ADHESION	TIGHT JXN	Toll-like
6	Aktp473	AKT1	AKT	MTOR	BAD	PTEN	MAPK	Jak/STAT	ERBB2	VEGF	APOPTOSIS	ADHESION	TIGHT JXN	Toll-like
7	AMPK	AMPK	AUTOPHAGY	MTOR	INSULIN	ADIPOCYTOKINE
8	AMPKp172	AMPK	AUTOPHAGY	MTOR	INSULIN	ADIPOCYTOKINE
9	AR	AR	BR_CA_ESTROGEN	ANDROGEN SIGNALING
10	BADp112	BAD	AKT	BAD	BR_CA_ESTROGEN	APOPTOSIS	INSULIN	VEGF	ERBB2
11	Bcatenin	CTNNB1	WNT SIGNALING	CELLADHESION	BR_CA_ESTROGEN
12	BCL2	BCL2	APOPTOSIS	BAD	BR_CA_ESTROGEN	CELLADHESION
13	Caveolin1	CAV1	CELLADHESION
14	CCNB1	CCNB1	CELLCYCLE	p53
15	CCND1	CCND1	CELLCYCLE	BR_CA_ESTROGEN	p53
16	CCNE1	CCNE1	CELLCYCLE	BR_CA_ESTROGEN	p53
17	CCNE2	CCNE2	CELLCYCLE	BR_CA_ESTROGEN	p53
18	CD31	CD31	NONE
19	cJUN	JUN	MAPK	ERBB2	WNT SIGNALING	CELLADHESION	Toll-like	JNKPATHWAY
20	cJUNp73	JUN	MAPK	ERBB2	WNT SIGNALING	CELLADHESION	Toll-like	JNKPATHWAY
21	cKit	KIT	CYTOKINE (MCGF)	PIK3CA	MELANOGENESIS	mTor
22	ClCasp7	CASP7	APOPTOSIS
23	cMyc	MYC	MAPK	ERBB2	TGFB	p53	WNT SIGNALING	Jak/STAT
24	CollagenVI	COL6A1	ECM-MATRIX INTERACTION		CELLADHESION
25	E cadherin	CDH1	CELLADHESION
26	4EBP1	EIF4EBP1	ERBB2	MTOR	INSULIN
27	4EBP1p37_46	EIF4EBP2	ERBB2	MTOR	INSULIN
28	EGFR*	EGFR	ERBB2	BR_CA_ESTROGEN	CALCIUM	CELLADHESION	CYTOKINE	MAPK	GNRH
29	EGFRp922	EGFR	ERBB2	BR_CA_ESTROGEN	CALCIUM	CELLADHESION	CYTOKINE	MAPK	GNRH
30	EIG	MM-1(PFD5)	NOT LISTED
31	ER	ESR1	BR_CA_ESTROGEN	p53	DRUG RESISTANCE
32	ERK2	MAPK1	MAPK	ERBB2	MTOR	TGFB	VEGF	Toll-like	CELLADHESION
33	ERp118	ESR1	BR_CA_ESTROGEN	p53	DRUG RESISTANCE
34	FKHRL1	FKHRL1	AKT	DNA DAMAGE	PTEN
35	FKHRL1p318	FKHRL2	AKT	DNA DAMAGE	PTEN
36	Fortilin	TPT1	NOT LISTED
37	GATA3	GATA3	BR_CA_ESTROGEN
38	GSK3	GSK3B	ERBB2	CELLCYCLE	CELLADHESION	WNT SIGNALING	INSULIN	HEDGEHOG
39	GSKp21_9		ERBB2	CELLCYCLE	CELLADHESION	WNT SIGNALING	INSULIN	HEDGEHOG
40	HDAC7	HDAC7	NOT LISTED
41	HER2	ERBB2	ERBB2	CALCIUM	CELLADHESION
42	IGF1RB	IGF1R	AKT	MTOR	BAD	CELLADHESION	MAPK
43	JNK*	MAPK8	JNKPATHWAY	MAPK	WNT SIGNALING	ERBB2	CELLADHESION	Toll-like	TGFB	INSULIN	GNRH
44	JNKp183_5*	MAPK8	JNKPATHWAY	MAPK	WNT SIGNALING	ERBB2	CELLADHESION	Toll-like	TGFB	INSULIN	GNRH
45	MEK1	MEK1	MAPK	ERBB2	VEGF	CELLADHESION	Toll-like	INSULIN	GNRH
46	MEK12p217_221		MAPK	ERBB2	VEGF	CELLADHESION	Toll-like	INSULIN	GNRH
47	MLK3	MLK3	MAPK	JNKPATHWAY
48	mTor	mTor	MTOR	ERBB2	INSULIN
49	mTorp2448	mTor	MTOR	ERBB2	INSULIN
50	p110alpha	PIK3CA	MTOR	ERBB2	INSULIN	CELLADHESION	Jak/STAT	APOPTOSIS	AKT
51	p38	MAPK14	MAPK	GNRH	Toll-like	VEGF
52	p38p180_2	MAPK14	MAPK	GNRH	Toll-like	VEGF
53	p70S6K	RPS6KB2	ERBB2	MTOR	TGFB
54	p70S6Kp389	RPS6KB2	ERBB2	MTOR	TGFB
55	PAI1*	PAI1	TGFB	INSULIN	COMPLEMENT	COAGULATION
56	PDK1	PDK1	PTEN	PIK3CA	INSULIN
57	PDK1p241	PDK2	PTEN	PIK3CA	INSULIN
58	PKCalpha	PKCA	MAPK	ERBB2	CALCIUM	CELLADHESION	PIK3CA	WNT SIGNALING	VEGF	TIGHT JXN
59	PKCap657	PKCA	MAPK	ERBB2	CALCIUM	CELLADHESION	PIK3CA	WNT SIGNALING	VEGF	TIGHT JXN
60	PR	PR	BR_CA_ESTROGEN
61	PTEN	PTEN	PIK3CA	BR_CA_ESTROGEN	p53	CELLADHESION	TIGHT JXN
62	Rab25	RAB25	NOT LISTED	AUTOPHAGY
63	Rb	RB	CELLCYCLE
64	Rbp807_811	RB	CELLCYCLE
65	S6p235.236	RPS6KB1	ERBB2	MTOR	TGFB	INSULIN
66	S6p240_4	RPS6KB2	ERBB2	MTOR	TGFB	INSULIN
67	Smad3*	Smad3	TGFB	CELLCYCLE	WNT SIGNALING	CELLADHESION	JNKPATHWAY
68	Src	Src	ERBB2	VEGF	GNRH	CELLADHESION
69	Srcp527	Src	ERBB2	VEGF	GNRH	CELLADHESION
70	STAT3p705	STAT3	Jak/STAT	ADIPOCYTOKINE
71	Stathmin	OP18	MAPK
72	TAU	TAU	MAPK
73	TAZ*	WWTR1	NOT LISTED	TGFB
74	TGLU	TGM	NONE
75	TSC2	TSC2	MTOR	p53	INSULIN
76	TSC2p1462	TSC2	MTOR	p53	INSULIN
77	VEGFR2	FLK1	VEGF	CELLADHESION	CYTOKINE
78	XIAP	XIAP	APOPTOSIS	CELLADHESION
79	YAP	YAP	NOT LISTED
80	YKL40*	CHI3L1	NOT LISTED
			NOTES:	34 DIFFERENT SIGNALING PATHWAYS WERE CATEGORIZED FOR THESE PROTEINS
				* WITH BOLD HIGHLIGHT - INDICATES THE 7 PROTEINS THAT WERE ASSOCIATED WITH CA-125					EGFR, JNK, JNKp183_185, Smad3, PAI1, TAZ, YKL40
				BOLD HIGHLIGHT ONLY - INDICATES PROTEINS NOT SELECTED BY ANALYSIS THAT ARE TGFB PATHWAY MEMBERS
				PATHWAY DESIGNATIONS IN BOLDED ITALICS ARE THOSE THAT WERE NOT LISTED IN DATABASE BUT GOOD SUPPORTIVE EVIDENCE IS AVAILABLE IN THE LITERATURE TO SUPPORT DESIGNATION
				BR_CA_ESTROGEN = ESTROGEN BREAST CANCER PATHWAY
			CONTINGENCY TABLE FOR TGFB
				CHOSEN PROTEINS	THOSE NOT CHOSEN
				5	6	11
			TGFB	2	67	69
			NOT TGFB	7	73	80
SIGNALING PATHWAY CATEGORIES
ADIPOCYTOKINE		AMPK (p)	STAT3p705
AKT		AKT(308,473)	BADp112	FKHRL1 (p)	IGF1RB	p110alpha	IGFRB
ANDROGEN SIGNALING		AR
APOPTOSIS		AKT(308,473)	BADp112	BCL2	p53	Cleaved Casp7	XIAP	p110alpha
AUTOPHAGY		AMPK (p)	Rab25
BAD		BADp112	BCL2	AKT(308,473)	IGF1RB
BR_CA_ESTROGEN		AIB1	AR	BADp112	Bcatenin	BCL2	CCND1	CCNE1	CCNE2	EGFR (p)	ER (p)	ERp118	GATA3	PR	PTEN
CALCIUM		EGFR (p)	PKCalpha (p)	Her2
CARBOHYDRATE METABOLISM		AcCoA (p)
CELLADHESION		AIB1	Bcatenin	BCL2	Caveolin1	cJUN (p)	CollagenVI	E cadherin	EGFR (p)	JNK (p)	PKCalpha (p)	p110alpha	SMAD (p)	SRC (p)	ERK2	GSK (p)	MEK1 (p)	ERBB2	VEGF	XIAP	ERK2	IGFR1B
CELLCYCLE		CCNB1	CCND1	CCNE1	CCNE2	GSK (p)	Rb (p)	SMAD (p)
COAGULATION		PAI1
COMPLEMENT		PAI1
DNA DAMAGE		p53	FKHRL1 (p)
CYTOKINE		cKit	EGFR (p)	VEGFR2
DRUG RESISTANCE		ER (P)
ECM-MATRIX INTERACTION		CollagenVI
ERBB2		AKT(308,473)	BADp112	cJUN and cJUNp73	cMyc	4EBP1 (p)	EGFR (p)	ERK2	GSK (p)	JNK (p)	MEK1	MEK 1/2p	mTor (p)	p110 alpha	p70S6K (p)	PKCalpha (p)	S6 Kinase (p)	SRC (p)
GNRH		EGFR (p)	JNK (p)	MEK1 (p)	p38 (p)	SRC (p)
HEDGEHOG		GSK (p)
INSULIN		AcCoA (p)	AMPK (p)	BADp112	4EBP1 (p)	JNK (p)	MEK1 (p)	GSK (p)	mTor	PDKalpha (p)	PAI1	PDK1 (p)	S6	TSC2(p)
Jak/STAT		AKT(308,473)	cMyc	p110alpha	STAT3p705	p38 (p)
JNKPATHWAY		JNK (p)	MLK3	cJUN and cJUNp73	Smad3 (p)
MAPK		AKT(308,473)	cJUN(p)	cMyc	EGFR(p)	ERK2	IGF1RB	JNK(p)	MEK1	MEK1/2(p)	MLK3	p38	PKCalpha (p)	Stathmin	TAU
MELANOGENESIS		cKit
MTOR		mTor(p)	4EBP1 (p)	AMPK (p)	ERK2	IGF1RB	p110 alpha	p70S6K (p)	S6p	TSC2(p)
PIK3CA		p110 alpha	AKT(308,473)	PDK1 (p)	PDKalpha (p)	mTor	PTEN	OTHERS
p53		CCNB1	CCND1	CCNE1	CCNE2	cMyc	ER (P)
PTEN		AKT(308,473)	FKHRL1 (p)	PDK1 (p)	PTEN
TIGHT JXN		AKT(308,473)	PKCalpha (p)	PTEN
TGFB		cJUN (p)	ERK2	p70S6K (P)	S6p	Smad3 (P)	TAZ	PAI1
Toll-like		AKT(308,473)	ERK2	MEK 1/2p	cJUN (p)	JNK (p)	p38 (p)
VEGF		AIB1	AKT(308,473)	BADp112	ERK2	MEK1 (p)	p38 (p)	PKCalpha (p)	Src (p)	VEGFR2
WNT SIGNALING		AIB1	Bcatenin	CJUN and CJUNp73	cMyc	GSK (p)	JNK (p)	PKCalpha (p)	Smad3 (p)
NOTE:
p53 Pathway was included though we lack a validated antibody for RPPA
